# Supplementary material
Source: Springer Nature journal article supplement (https://www.springermedizin.de/resource/supplementary/12889_2009_2079_MOESM5_ESM.pdf/9484526)

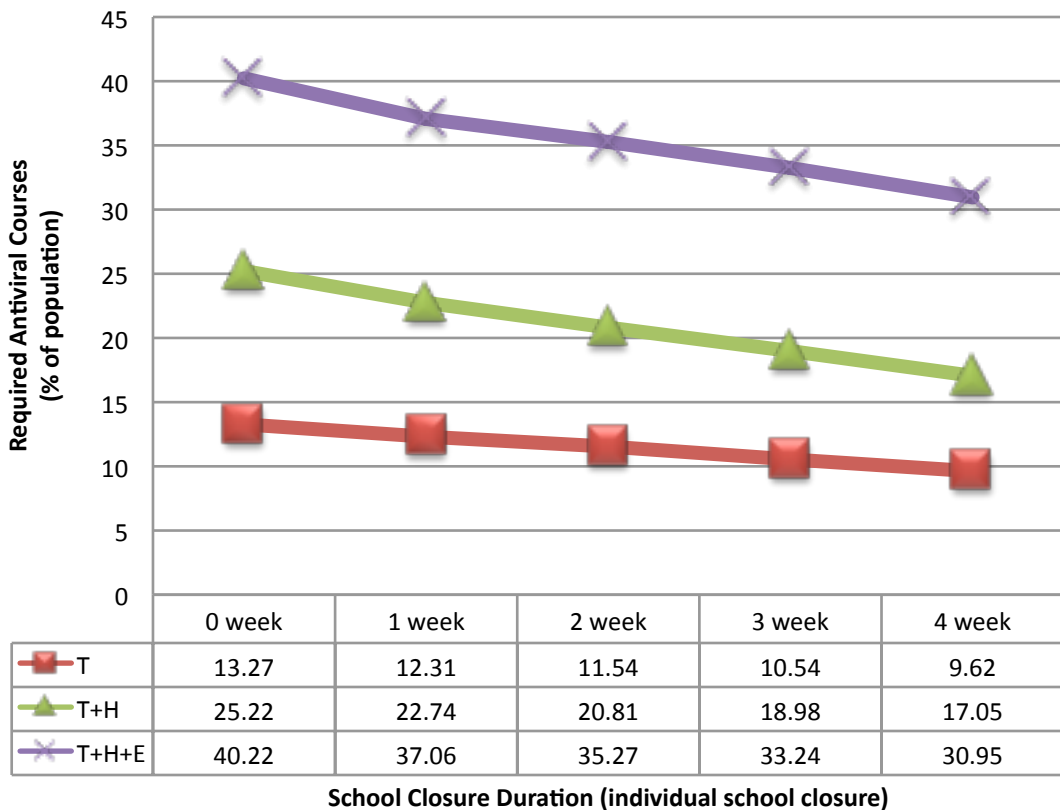

**School Closure Duration (individual school closure)**

Supplement: MOESM5 [file 9484526]
